# Supplementary material
Source: PubMed Central journal article supplement (PMC2947019)

**Supplemental Data**

**Figure S1. Protein profile of wild-type and MDG/TRPC3 KD cells on D0 and D3 on SDS-PAGE gel.** Cell lysate of wild-type or MDG/TRPC3 KD cells on D0 and D3 (30 µg of total protein) was subjected to SDS-PAGE (10%) followed by coomassie blue staining. There was no big difference in protein expression profiles between wild-type and MDG/TRPC3 KD cells on D0. Unlike cell lysate on D0, there were significant changes in the protein expression profiles between wild-type and MDG/TRPC3 KD cells on D3: mainly reduced or increased bands are indicated by the blue or red asterisks, respectively.

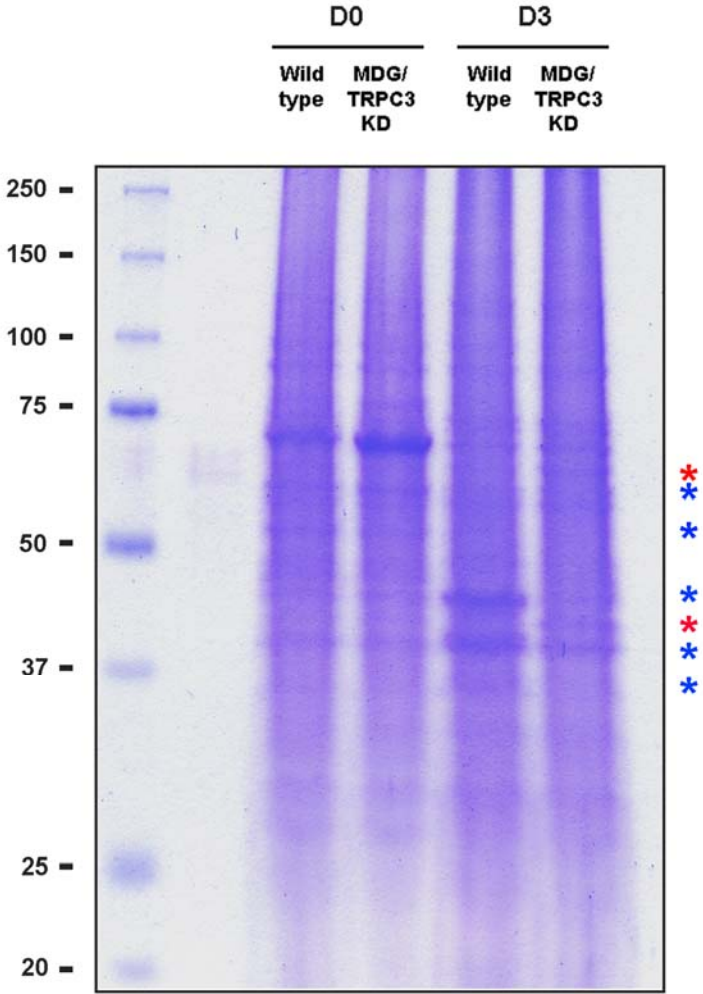

**Figure S2. No  $\text{Ca}^{2+}$  transient in either wild-type or MDG/TRPC3 KD myoblasts in response to KCl or caffeine.** KCl (a DHPR activator by inducing membrane depolarization) or caffeine (a direct agonist of RyR1) was applied to wild-type or MDG/TRPC3 KD myoblasts loaded with fura-2. No significant  $\text{Ca}^{2+}$  transient was observed in either type of myoblasts. At least 25 myoblasts of each type were tested. The traces were obtained from individual myoblasts.

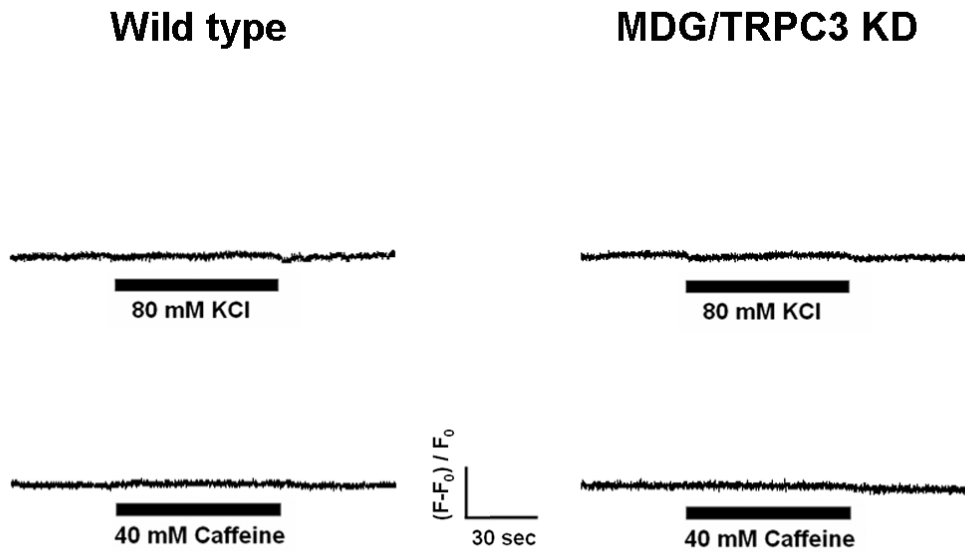

**Figure S3. An increase in resting cytoplasmic  $\text{Ca}^{2+}$  level but no change in the SR  $\text{Ca}^{2+}$  content in MDG myoblasts.** (A) The SR  $\text{Ca}^{2+}$  in MDG myoblasts loaded with fura-2 was depleted by treatment with 10  $\mu\text{M}$  cyclopiazonic acid (CPA), and peak area for 400 sec normalized to that of wild-type controls in Figure 4 is shown in the histograms (right). There was no change in the SR  $\text{Ca}^{2+}$  content in MDG myoblasts compared with wild-type myoblasts. Results are means  $\pm$  SE (58 wild-type or 52 MDG myoblasts). The trace is an average of 4 traces. (B) Resting cytoplasmic  $\text{Ca}^{2+}$  levels in MDG myoblasts loaded with fura-2 were also normalized to that of wild-type controls in Figure 4 and are shown as histograms. Resting cytoplasmic  $\text{Ca}^{2+}$  was increased in MDG myoblasts compared with that of wild-type controls. Data are means  $\pm$  SE (31 wild-type or 35 MDG myoblasts). \*significant difference compared with wild-type ( $p < 0.05$ ).

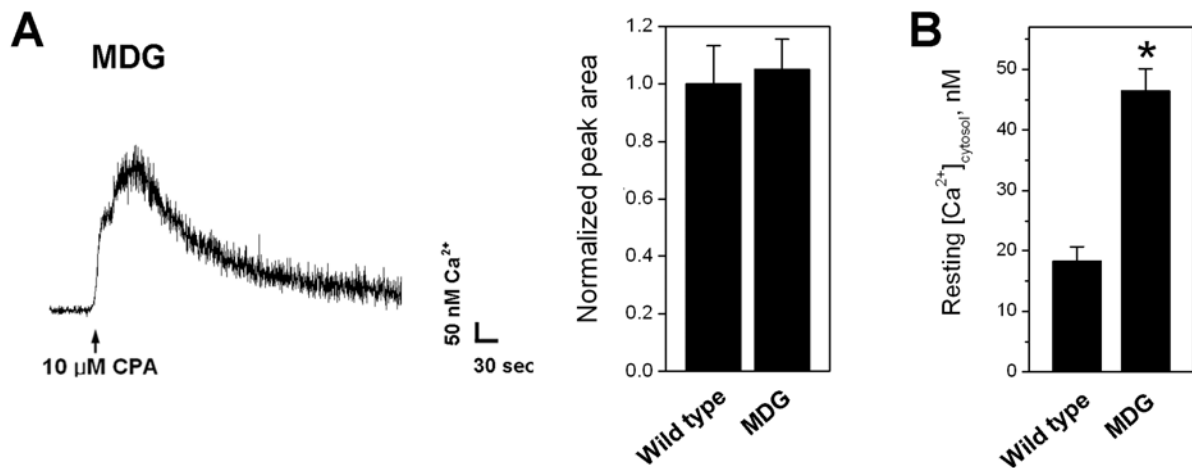

Supplement: emm-42-614-s001.pdf [file emm-42-614-s001.pdf]
